# Supplementary material for: Drug Repositioning for Noonan and LEOPARD Syndromes by Integrating Transcriptomics With a Structure-Based Approach
Source: Front Pharmacol. 2020 Jun 26;11:927. doi: 10.3389/fphar.2020.00927 (PMC7333460; doi:10.3389/fphar.2020.00927)
Supplement: Supplementary file 6 [file Table_2.xlsx]

## Sheet: KEGG_NS
Category	Term	Count	%	PValue	Genes	List Total	Pop Hits	Pop Total	Fold Enrichment	Bonferroni	Benjamini	FDR
KEGG_PATHWAY	hsa03010:Ribosome	55	0.0621006	6.42e-40	RPL18, RPL17, RPLP2, RPS27L, RPS2, RPS3A, RPLP0, RPLP1, FAU, RPL11, RPL12, RPL35A, MRPS6, RPS4X, RPS19, RPS16, RPL41, RPS17, RPS15, RPS12, RPS4Y1, RPS13, RPS10, RPS11, UBA52, RPL27A, RPS15A, RPL36, RPL38, RPL39, RPS25, RPS26, RPL30, RPS27, RPS29, RPL32, RPL6, RPL9, RPL8, RPL3, RPL10A, RPL4, RPS20, RPS24, RPSA, RPL26, RPS9, RPL27, RPL24, MRPS21, RPS6, RPS5, RPS8, RPL18A, RPL37A	291	136	6879	9.55996	1.55e-37	1.55e-37	8.29e-37
KEGG_PATHWAY	hsa01130:Biosynthesis of antibiotics	26	0.0293566	2.58e-06	ALDOA, LDHA, ASS1, PGAM1, HMGCS1, HK1, AASS, GLDC, FDFT1, TPI1, ATIC, GAPDH, ENO1, ODC1, MSMO1, CS, TKT, ACLY, NME4, ALDH7A1, NME1, OAT, PAICS, MDH1, PRPS1, CBS	291	212	6879	2.89914	0.000621	0.000311	0.00333151
KEGG_PATHWAY	hsa01230:Biosynthesis of amino acids	11	0.0124201	0.0008	ALDOA, TPI1, ASS1, MAT2A, CS, PGAM1, TKT, GAPDH, CBS, PRPS1, ENO1	291	72	6879	3.61154	0.175483	0.0622944	1.0288
KEGG_PATHWAY	hsa00270:Cysteine and methionine metabolism	8	0.00903281	0.000901	TST, LDHA, AHCY, MAT2A, DNMT3B, SMS, CBS, MDH1	291	38	6879	4.97667	0.195195	0.0528415	1.15706
KEGG_PATHWAY	hsa00480:Glutathione metabolism	9	0.0101619	0.00118627	GSTM1, GSTM2, ODC1, TXNDC12, RRM1, GSTO1, SMS, MGST1, GSTP1	291	51	6879	4.17162	0.248783	0.0556062	1.5214
KEGG_PATHWAY	hsa04066:HIF-1 signaling pathway	11	0.0124201	0.00692845	TFRC, ERBB2, SLC2A1, TEK, HK1, RPS6, GAPDH, PRKCB, TIMP1, ENO1, PIK3R2	291	96	6879	2.70866	0.812798	0.243658	8.58853
KEGG_PATHWAY	hsa04978:Mineral absorption	7	0.00790371	0.00975376	ATP1B1, MT1A, MT1H, MT1X, MT1G, FTL, MT1F	291	44	6879	3.76078	0.905787	0.286417	11.8912
KEGG_PATHWAY	hsa00190:Oxidative phosphorylation	13	0.0146783	0.0100951	ATP6V0C, NDUFS5, ATP6V0E1, COX7A2, NDUFA3, NDUFS4, NDUFA8, NDUFS8, COX7C, UQCRFS1, COX17, COX5B, PPA1	291	133	6879	2.3106	0.913299	0.263363	12.2827
KEGG_PATHWAY	hsa04142:Lysosome	12	0.0135492	0.0128032	ATP6V0C, LAPTM4B, GNS, CTSL, LAMP2, NPC2, PSAP, IGF2R, SCARB2, CTSB, GGA1, CTSV	291	121	6879	2.34438	0.955197	0.291818	15.3321
KEGG_PATHWAY	hsa04110:Cell cycle	12	0.0135492	0.0151814	MCM7, YWHAH, CCND2, YWHAB, SKP2, CDC20, ORC6, CDC16, PTTG1, MCM3, MAD2L2, MCM6	291	124	6879	2.28766	0.974947	0.308352	17.9291
KEGG_PATHWAY	hsa01200:Carbon metabolism	11	0.0124201	0.0204423	ALDOA, TPI1, CS, PGAM1, HK1, TKT, GAPDH, MDH1, PRPS1, ENO1, GLDC	291	113	6879	2.30116	0.99311	0.363972	23.415
KEGG_PATHWAY	hsa00010:Glycolysis / Gluconeogenesis	8	0.00903281	0.0220145	ALDOA, LDHA, ALDH7A1, TPI1, PGAM1, HK1, GAPDH, ENO1	291	67	6879	2.82259	0.995321	0.360497	24.9875
KEGG_PATHWAY	hsa05012:Parkinson's disease	12	0.0135492	0.0369393	NDUFS5, COX7A2, NDUFA3, NDUFS4, NDUFA8, SLC25A4, SLC25A5, NDUFS8, UCHL1, COX7C, UQCRFS1, COX5B	291	142	6879	1.99768	0.999885	0.502304	38.5006
KEGG_PATHWAY	hsa04114:Oocyte meiosis	10	0.011291	0.0440321	YWHAH, YWHAB, CALM3, CDC20, CDC16, PTTG1, ITPR3, MAD2L2, PPP1CC, CALM2	291	111	6879	2.12966	0.999981	0.539377	44.1008
KEGG_PATHWAY	hsa05010:Alzheimer's disease	13	0.0146783	0.0509866	NDUFA3, COX7A2, NDUFA8, COX7C, UQCRFS1, ITPR3, COX5B, NDUFS5, NDUFS4, NDUFS8, CALM3, GAPDH, CALM2	291	168	6879	1.82922	0.999997	0.568638	49.1314
KEGG_PATHWAY	hsa05230:Central carbon metabolism in cancer	7	0.00790371	0.0517647	FGFR3, ERBB2, SLC2A1, PGAM1, HK1, SLC7A5, PIK3R2	291	64	6879	2.58553	0.999997	0.550945	49.6675
KEGG_PATHWAY	hsa04915:Estrogen signaling pathway	9	0.0101619	0.0567107	HSP90AB1, FOS, HSP90AA1, CALM3, GNAS, ITPR3, HSPA8, CALM2, PIK3R2	291	99	6879	2.14902	0.999999	0.562927	52.955
KEGG_PATHWAY	hsa05031:Amphetamine addiction	7	0.00790371	0.0585733	FOS, CALM3, GNAS, FOSB, PPP1CC, CALM2, PRKCB	291	66	6879	2.50719	1	0.554312	54.1408
KEGG_PATHWAY	hsa05110:Vibrio cholerae infection	6	0.00677461	0.0667183	ACTB, ATP6V0C, ACTG1, ATP6V0E1, GNAS, PRKCB	291	52	6879	2.7276	1	0.58348	59.0094
KEGG_PATHWAY	hsa04971:Gastric acid secretion	7	0.00790371	0.0864255	ATP1B1, EZR, CALM3, GNAS, ITPR3, CALM2, PRKCB	291	73	6879	2.26677	1	0.663516	68.885
KEGG_PATHWAY	hsa04510:Focal adhesion	14	0.0158074	0.0951965	ACTB, COL4A1, ERBB2, PPP1CC, FLNC, VCL, PRKCB, ACTG1, CCND2, COL1A2, ZYX, COL1A1, SPP1, PIK3R2	291	206	6879	1.60655	1	0.682745	72.5302
KEGG_PATHWAY	hsa04973:Carbohydrate digestion and absorption	5	0.00564551	0.0991987	ATP1B1, HK1, AMY1C, AMY1A, PIK3R2	291	42	6879	2.81419	1	0.681594	74.0589

## Sheet: KEGG_LS
Category	Term	Count	%	PValue	Genes	List Total	Pop Hits	Pop Total	Fold Enrichment	Bonferroni	Benjamini	FDR
KEGG_PATHWAY	hsa04512:ECM-receptor interaction	24	0.0426963	2.64907e-16	TNC, COL3A1, ITGA11, ITGA1, ITGA2, ITGA4, ITGB3, COL5A2, LAMA2, LAMA4, CD44, ITGA5, ITGAV, ITGA8, COL6A3, ITGB6, COL1A2, COL6A2, COL6A1, COL1A1, THBS1, THBS2, SPP1, FN1	206	87	6879	9.21192	4.95159e-14	4.95159e-14	2.88658e-13
KEGG_PATHWAY	hsa04510:Focal adhesion	34	0.0604864	7.50302e-16	CAV2, CAV1, TNC, COL3A1, ITGA11, ITGB3, ITGAV, COL6A3, ITGB6, COL6A2, COL6A1, PDGFC, THBS1, THBS2, SPP1, FN1, ROCK2, ITGA1, ITGA2, ACTN3, ITGA4, CAPN2, COL5A2, PRKCB, LAMA2, VEGFD, LAMA4, ITGA5, JUN, ITGA8, COL1A2, PDGFRA, PDGFRB, COL1A1	206	206	6879	5.5115	1.73306e-13	8.65974e-14	9.88098e-13
KEGG_PATHWAY	hsa04151:PI3K-Akt signaling pathway	37	0.0658234	2.16293e-11	FGFR2, TNC, COL3A1, ITGA11, LPAR3, TLR4, KIT, ITGB3, IFNA7, CASP9, ITGAV, ITGB6, COL6A3, COL6A2, COL6A1, PDGFC, MYB, THBS1, ANGPT2, INSR, THBS2, SPP1, FN1, ITGA1, ITGA2, ITGA4, COL5A2, DDIT4, LAMA2, VEGFD, LAMA4, ITGA5, ITGA8, COL1A2, PDGFRA, PDGFRB, COL1A1	206	345	6879	3.5813	4.82335e-09	1.60778e-09	2.75929e-08
KEGG_PATHWAY	hsa05206:MicroRNAs in cancer	27	0.0480333	2.94533e-07	PTGS2, ERBB3, MIRLET7F2, TNC, MMP9, MIR200B, MIR30D, ZEB1, ITGB3, MIR29A, TIMP3, TGFB2, MIR141, CD44, MIR29B1, THBS1, MIR181B2, MIR199A1, MIR221, PRKCB, DDIT4, ITGA5, MIRLET7G, PDGFRA, PDGFRB, MIR181A2, PLAU	206	286	6879	3.15251	6.56788e-05	1.64201e-05	0.00037574
KEGG_PATHWAY	hsa05205:Proteoglycans in cancer	22	0.0391382	4.21825e-07	WNT5A, CAV2, CAV1, ROCK2, ERBB3, LUM, MMP9, ITGA2, TLR4, ITGB3, TIMP3, MMP2, PRKCB, TGFB2, GPC3, CD44, ITGA5, ITGAV, PTCH1, THBS1, PLAU, FN1	206	200	6879	3.67325	9.40626e-05	1.88132e-05	0.000538127
KEGG_PATHWAY	hsa05146:Amoebiasis	16	0.0284642	4.61155e-07	COL3A1, CXCL8, TLR4, ACTN3, COL5A2, PRKCB, TGFB2, LAMA2, LAMA4, ARG2, COL1A2, IL1B, SERPINB1, SERPINB3, COL1A1, FN1	206	106	6879	5.04048	0.000102832	1.71394e-05	0.0005883
KEGG_PATHWAY	hsa05412:Arrhythmogenic right ventricular cardiomyopathy (ARVC)	11	0.0195691	2.49704e-05	ITGA5, ITGAV, ITGA8, ITGB6, ITGA11, ITGA1, LEF1, ITGA2, ITGA4, ITGB3, CACNA2D2	206	67	6879	5.48247	0.005553	0.00079518	0.0318504
KEGG_PATHWAY	hsa05410:Hypertrophic cardiomyopathy (HCM)	11	0.0195691	9.52363e-05	ITGA5, ITGAV, ITGA8, ITGB6, ITGA11, ITGA1, ITGA2, ITGA4, ITGB3, CACNA2D2, TGFB2	206	78	6879	4.7093	0.0210148	0.00265132	0.121426
KEGG_PATHWAY	hsa05200:Pathways in cancer	27	0.0480333	9.57051e-05	WNT5A, FGFR2, PTGS2, MMP9, CXCL8, LPAR3, KIT, MMP2, MMP1, TGFB2, EDNRA, CASP9, ITGAV, FN1, EPAS1, ROCK2, FLT3, LEF1, ITGA2, PRKCB, LAMA2, VEGFD, LAMA4, JUN, PDGFRA, PDGFRB, PTCH1	206	393	6879	2.29419	0.0211171	0.00236866	0.122024
KEGG_PATHWAY	hsa05414:Dilated cardiomyopathy	11	0.0195691	0.000178878	ITGA5, ITGAV, ITGA8, ITGB6, ITGA11, ITGA1, ITGA2, ITGA4, ITGB3, CACNA2D2, TGFB2	206	84	6879	4.37292	0.0391081	0.00398139	0.227957
KEGG_PATHWAY	hsa04640:Hematopoietic cell lineage	11	0.0195691	0.000239823	CR2, CD44, ITGA5, FLT3, ITGA1, IL1B, ITGA2, ANPEP, ITGA4, KIT, ITGB3	206	87	6879	4.22213	0.0520817	0.00485065	0.305514
KEGG_PATHWAY	hsa05144:Malaria	8	0.0142321	0.000558735	CCL2, IL18, CXCL8, IL1B, TLR4, THBS1, THBS2, TGFB2	206	49	6879	5.45195	0.117179	0.0103323	0.71045
KEGG_PATHWAY	hsa05323:Rheumatoid arthritis	10	0.0177901	0.00115707	CTSK, TNFRSF11A, CCL2, IL18, JUN, CXCL8, IL1B, TLR4, MMP1, TGFB2	206	88	6879	3.79468	0.227541	0.0196638	1.46609
KEGG_PATHWAY	hsa04810:Regulation of actin cytoskeleton	16	0.0284642	0.00144731	FGFR2, ROCK2, ITGA1, ITGA11, ITGA2, ACTN3, ITGA4, ITGB3, ITGA5, ITGAV, ITGA8, ITGB6, PDGFRA, PDGFRB, PDGFC, FN1	206	210	6879	2.54424	0.276015	0.0228062	1.83073
KEGG_PATHWAY	hsa04974:Protein digestion and absorption	9	0.0160111	0.00452184	COL3A1, COL6A3, SLC7A8, COL1A2, COL6A2, COL12A1, COL6A1, COL1A1, COL5A2	206	88	6879	3.41521	0.63602	0.0651574	5.61769
KEGG_PATHWAY	hsa05134:Legionellosis	7	0.0124531	0.00510563	CXCL1, HSPA2, CASP9, IL18, CXCL8, IL1B, TLR4	206	54	6879	4.32875	0.680651	0.0688566	6.32136
KEGG_PATHWAY	hsa04060:Cytokine-cytokine receptor interaction	16	0.0284642	0.00580271	CXCL1, CCL2, IL6ST, IL18, CXCL8, CCL26, TGFB2, INHBA, ACVR2B, TNFRSF11A, IFNA7, TNFRSF10D, CXCL16, TNFRSF19, IL1B, IL13RA1	206	243	6879	2.19873	0.72686	0.0734984	7.15526
KEGG_PATHWAY	hsa05230:Central carbon metabolism in cancer	7	0.0124531	0.0116023	FGFR2, FLT3, PGAM4, PDGFRA, PGAM1, PDGFRB, KIT	206	64	6879	3.65238	0.925907	0.134614	13.8325
KEGG_PATHWAY	hsa05143:African trypanosomiasis	5	0.00889506	0.0159329	LAMA4, IL18, IL1B, IDO1, PRKCB	206	33	6879	5.05958	0.97217	0.171806	18.5267
KEGG_PATHWAY	hsa01230:Biosynthesis of amino acids	7	0.0124531	0.0198981	CTH, RPEL1, ARG2, ALDOC, PGAM4, ENO2, PGAM1	206	72	6879	3.24656	0.988689	0.200766	22.6169
KEGG_PATHWAY	hsa04310:Wnt signaling pathway	10	0.0177901	0.021751	WNT5A, DKK2, CER1, DKK1, PRICKLE1, ROCK2, JUN, FRAT2, LEF1, PRKCB	206	138	6879	2.4198	0.992583	0.208261	24.4626
KEGG_PATHWAY	hsa04015:Rap1 signaling pathway	13	0.0231271	0.0228163	FGFR2, VEGFD, ID1, PDGFRA, LPAR3, PDGFRB, PDGFC, KIT, ITGB3, THBS1, ANGPT2, INSR, PRKCB	206	210	6879	2.0672	0.994183	0.208602	25.5054
KEGG_PATHWAY	hsa05202:Transcriptional misregulation in cancer	11	0.0195691	0.0271841	PLAT, FLT3, MMP9, SIX1, HIST1H3A, CXCL8, HIST1H3C, GRIA3, IGFBP3, MEIS1, PLAU	206	167	6879	2.19955	0.997858	0.234492	29.6433
KEGG_PATHWAY	hsa05219:Bladder cancer	5	0.00889506	0.0328274	MMP9, CXCL8, THBS1, MMP2, MMP1	206	41	6879	4.07234	0.999415	0.266655	34.676
KEGG_PATHWAY	hsa05164:Influenza A	11	0.0195691	0.0347091	CCL2, HSPA2, IFNA7, CASP9, TNFRSF10D, IL18, JUN, CXCL8, IL1B, TLR4, PRKCB	206	174	6879	2.11106	0.999621	0.270289	36.279
KEGG_PATHWAY	hsa05132:Salmonella infection	7	0.0124531	0.0368349	CXCL1, ROCK2, IL18, JUN, CXCL8, IL1B, TLR4	206	83	6879	2.81629	0.999768	0.275226	38.0462
KEGG_PATHWAY	hsa05222:Small cell lung cancer	7	0.0124531	0.0406731	LAMA2, LAMA4, CASP9, PTGS2, ITGAV, ITGA2, FN1	206	85	6879	2.75003	0.999905	0.290328	41.123
KEGG_PATHWAY	hsa04742:Taste transduction	5	0.00889506	0.0440956	TAS2R14, TAS2R43, SCNN1G, SCNN1A, TAS2R30	206	45	6879	3.71036	0.999957	0.301743	43.7471
KEGG_PATHWAY	hsa04064:NF-kappa B signaling pathway	7	0.0124531	0.044756	PRKCQ, TNFRSF11A, PTGS2, CXCL8, IL1B, TLR4, PLAU	206	87	6879	2.68681	0.999963	0.296788	44.2409
KEGG_PATHWAY	hsa04610:Complement and coagulation cascades	6	0.0106741	0.0541456	PLAT, CR2, SERPINE1, CFH, TFPI, PLAU	206	69	6879	2.90376	0.999996	0.338859	50.8428
KEGG_PATHWAY	hsa04670:Leukocyte transendothelial migration	8	0.0142321	0.0554154	ROCK2, MMP9, CD99, CLDN10, ACTN3, ITGA4, MMP2, PRKCB	206	115	6879	2.32301	0.999997	0.336419	51.6781
KEGG_PATHWAY	hsa04550:Signaling pathways regulating pluripotency of stem cells	9	0.0160111	0.0572516	FGFR2, WNT5A, INHBA, ACVR2B, ID1, IL6ST, NODAL, MEIS1, ZIC3	206	140	6879	2.14671	0.999998	0.336913	52.8628
KEGG_PATHWAY	hsa05140:Leishmaniasis	6	0.0106741	0.0598616	PTGS2, JUN, IL1B, TLR4, ITGA4, TGFB2	206	71	6879	2.82196	0.999999	0.341067	54.5008
KEGG_PATHWAY	hsa05231:Choline metabolism in cancer	7	0.0124531	0.0803582	JUN, PDGFRA, PDGFRB, LYPLA1, PDGFC, PLPP1, PRKCB	206	101	6879	2.31438	1	0.422727	65.6538
KEGG_PATHWAY	hsa04621:NOD-like receptor signaling pathway	5	0.00889506	0.0848188	CXCL1, CCL2, IL18, CXCL8, IL1B	206	56	6879	2.98154	1	0.431481	67.7195
KEGG_PATHWAY	hsa05142:Chagas disease (American trypanosomiasis)	7	0.0124531	0.0895918	CCL2, JUN, SERPINE1, CXCL8, IL1B, TLR4, TGFB2	206	104	6879	2.24762	1	0.440898	69.8026
KEGG_PATHWAY	hsa04620:Toll-like receptor signaling pathway	7	0.0124531	0.0960565	CTSK, IFNA7, JUN, CXCL8, IL1B, TLR4, SPP1	206	106	6879	2.20521	1	0.455921	72.4267
KEGG_PATHWAY	hsa04668:TNF signaling pathway	7	0.0124531	0.0993804	CXCL1, CCL2, PTGS2, JUN, MMP9, IL1B, MMP14	206	107	6879	2.1846	1	0.45896	73.6926
