# Supplementary material for: Drug Repositioning for Noonan and LEOPARD Syndromes by Integrating Transcriptomics With a Structure-Based Approach
Source: Front Pharmacol. 2020 Jun 26;11:927. doi: 10.3389/fphar.2020.00927 (PMC7333460; doi:10.3389/fphar.2020.00927)
Supplement: Supplementary file 9 [file Table_5.xlsx]

## Sheet: LS_lincs
Drugs_name	LS_XP.GScore	LS_IFDScore	WT_XP.GScore	WT_IFDScore	L1000	Adjusted scores	DrugBank ID	Phamrcological classes	WHO ATC code	original indication	Defined Daily Dose	Boxed warnings	notes	resource
QL-X-138	-6.635	-1127.29	-5.371	-1133.45	0.1115	-1123.3		a selective and potent BTK/MNK dual kinase inhibitor		oncology
Scriptaid	-7.052	-1128.38	-6.79	-1134.93	0.0885	-1124.13		a histone deacetylase (HDAC) inhibitor		oncology			Scriptaid can further be used in the treatment of cardiac/vasculature diseases such as hypertrophy, hypertension, myocardial infarction, reperfusion, ischaemic heart disease, angina, arryhtmias, hypercholestremia, atherosclerosis and stroke	US20140235671A1
Importazole	-6.029	-1129.37	-5.701	-1136.2	0.1607	-1124.94		a transport receptor importin-β inhibitor
BRD-K41859756	-8.433	-1128.55	-7.142	-1137.4	0.1148	-1122.81		a heat shock protein 90 inhibitor		oncology
KM 00927	-5.643	-1126.99	-7.29	-1137.78	0.1082	-1120		a histone deacetylase (HDAC) inhibitor		oncology
pelitinib	-8.593	-1130.85	-7.25	-1138.77	0.1082	-1125.72	DB05524	a selective, and irreversible epidermal growth factor receptor (EGFR) inhibitor		oncology
S1030	-10.277	-1131.38	-8.802	-1138.91	0.0984	-1126.5		a histone deacetylase (HDAC) inhibitor		oncology
MK-0591	-7.276	-1130.17	-7.694	-1139.34	0.0918	-1124.23		a novel 5-lipoxygenase activating protein inhibitor		atopic asthma
89671	-5.437	-1129.62	-7.94	-1139.59	0.1148	-1123.16
dasatinib	-7.159	-1131.54	-6.854	-1139.71	0.0951	-1126.24	DB01254	a BCR-ABL inhibitor	L01XE06	chronic myelogenous leukemia (CML) and acute lymphoblastic leukemia (ALL)		No	A low dose of dasatinib reversed the expression levels of molecular markers of cardiomyopathy and reduced cardiac fibrosis in NS and NSML mice. Low-dose dasatinib may represent a unifying therapy for the treatment of PTPN11-related cardiomyopathies	PMID: 27942593
Homoharringtonine	-7.404	-1133.53	-8.112	-1140.11	0.0951	-1129.26		a translation elongation inhibitor	L01XX40	chronic myelogenous leukemia (CML)		No
TWS119	-6.89	-1131	-7.753	-1141.09	0.0885	-1124.46		a glycogen synthase kinase 3 beta (GSK3β) inhibitor		oncology			Inhibition of GSK3 results in changes in the activities of transcription and translation factors in the heart and promotes hypertrophic responses, and it is generally assumed that signal transduction from hypertrophic stimuli to GSK3 passes primarily through protein kinase B/Akt (PKB/Akt)	PMID: 18204489
Brefeldin A	-7.626	-1131.1	-8.758	-1141.38	0.1213	-1124.44
geldanamycin	-7.811	-1131.74	-10.025	-1142.1	0.1213	-1125.02		a heat shock protein 90 inhibitor		oncology
Radicicol	-6.501	-1132.23	-7.371	-1142.2	0.141	-1125.77		a heat shock protein 90 inhibitor		oncology
canertinib	-7.953	-1134.16	-8.553	-1142.25	0.1082	-1128.92	DB05424	an irreversible tyrosine-kinase inhibitor		oncology
COT-10b	-6.679	-1133.32	-7.902	-1143.1	0.0918	-1126.98
afatinib	-8.012	-1132.46	-8.519	-1143.52	0.1049	-1125.29	DB08916	a selective, and irreversible epidermal growth factor receptor (EGFR) inhibitor	L01XE13	oncology		No

## Sheet: LS_cmap
Drugs_name	LS_XP.GScore	LS_IFDScore	WT_XP.GScore	WT_IFDScore	CMAP	Adjusted scores	DrugBank ID	Phamrcological classes	WHO ATC code	original indication	Defined Daily Dose	Boxed warnings	notes	resource
betulinic_acid	-5.092	-1122.91	-3.648	-1130.22	0.282717					oncology
lomustine	-4.328	-1124.81	-4.359	-1132.21	0.304947		DB01206	An alkylating agent	L01AD02	oncology		DELAYED MYELOSUPPRESSION and RISK OF OVERDOSAGE
papaverine	-7.177	-1080.95	-6.592	-1133.3	0.230133		DB01113	a nonxanthine phosphodiesterase inhibitor	A03AD01;G04BE02;G04BE52	the relief of cerebral and peripheral ischemia associated with arterial spasm and myocardial ischemia complicated by arrhythmias	0.1 g	No
hexylcaine	-5.726	-1125.75	-5.237	-1133.72	0.267604			a Voltage gated sodium channel inhibitor		local anesthetic
amylocaine	-4.155	-1124.23	-5.066	-1134.46	0.247692		DB09088	a Voltage gated sodium channel inhibitor		local anesthetic
sulfaphenazole	-6.766	-1129.16	-4.648	-1135.22	0.28017		DB06729	a dihydropteroate synthetase (DHPS) inhibitor	S01AB05;J01ED08;G01AE10	bacterial infections	1 g for J01			PMID: 30572675
6-bromoindirubin-3-oxime	-6.885	-1128.46	-7.648	-1135.61	0.244249			a glycogen synthase kinase 3β (GSK3β) inhibitor		oncology			The hybrid hydrogel system can co-deliver 6-Bromoindirubin-3-oxime (BIO) and insulin-like growth factor 1 (IGF-1) to areas of myocardial infarction and thus improve cardiac function by promoting the proliferation of cardiomyocytes and revascularization.	PMID: 26251592
lansoprazole	-7.4	-1128.86	-5.558	-1135.71	0.260713		DB00448	a H+/K+-ATPase blocker	A02BC03	peptic ulcer disease, gastroesophageal reflux disease, and Zollinger–Ellison syndrome	30 mg		Lansoprazole alleviates pressure overload-induced cardiac hypertrophy and heart failure in mice by blocking the activation of β-catenin	PMID: 30689763
phenoxybenzamine	-5.712	-1127.18	-5.483	-1136.12	0.256863		DB00925	An alpha-adrenergic antagonist	C04AX02	phaeochromocytoma (malignant), benign prostatic hypertrophy and malignant essential hypertension	30 mg	No
minaprine	-5.23	-1125.67	-6.748	-1136.39	0.251844			a monoamine oxidase inhibitor	N06AX07	anti-depression
U0125	-5.247	-1126.61	-5.9	-1136.45	0.240144			a MEK inhibitor
tiapride	-5.835	-1130.61	-5.185	-1136.55	0.272982			a selective D2 and D3 dopamine receptors	N05AL03	neurological and psychiatric disorders	0.4 g
nialamide	-6.698	-1128.75	-6.177	-1136.82	0.319726		DB04820	a non-selective, irreversible monoamine oxidase inhibitor (MAOI)	N06AF02	anti-depression	0.1 g
monastrol	-6.027	-1128.86	-5.978	-1137.12	0.226851			a Kinesin Eg5 inhibitor
fluocinonide	-6.945	-1128.86	-7.129	-1138.14	0.245585		DB01047	A topical glucocorticoid	C05AA11; D07AC08;D07CC05	eczema		No
dilazep	-8.28	-1128.64	-8.585	-1138.28	0.25594			an adenosine reuptake inhibitor	C01DX10	cardiopathy and renal disorders	0.1 g
proglumide	-11.306	-1088.77	-9.608	-1138.37	0.289496			a cholecystokinin antagonist	A02BX06	stomach ulcers	1.2 g
resveratrol	-5.516	-1131	-6.59	-1138.59	0.231695		DB02709	stilbenoid		Herpes labialis infections			there is potential beneficial effects of resveratrol in CVDs (atherosclerosis, hypertension, stroke, myocardial infarction, heart failure)	PMID: 27144581
nicardipine	-8.187	-1130.93	-7.625	-1138.86	0.231674		DB00622	A potent calcium channel blockader	C08CA04	marked vasodilator action	90 mg		nicardipine may improve left ventricular diastolic function of patients with HCM without serious side effects	PMID: 2636085
alpha-ergocryptine	-9.276	-1129.16	-9.976	-1139.5	0.27607
bromocriptine	-5.44	-1127.03	-9.086	-1139.6	0.23338		DB01200	D(2) dopamine receptor	N04BC01;G02CB01	Parkinsonian Syndrome	5 mg for G02;40 mg for N04		bromocriptine improves the hemodynamic profile in heart failure acutely and that long-term studies are appropriate to better characterize the role of this agent	PMID:6346844
butein	-6.214	-1132.06	-8.613	-1140.64	0.229278			a chalcone of the chalconoids		oncology
LY-294002	-4.905	-1131.84	-5.33	-1140.65	0.24844			a strong inhibitor of phosphoinositide 3-kinases (PI3Ks); a BET inhibitor		oncology			PI3K inhibition by LY294002 or wortmannin abolished the myocardin-dependent SRF stimulation observed in the T468M LS cell line. Consequently, these data suggest that LS-induced PI3K upregulation can enhance SRF/myocardin activity in a reconstituted model.	PMID: 20308328
glycocholic_acid	-11.51	-1133.27	-9.684	-1141.48	0.245345			a crystalline bile acid					bile acids (Bas) as newly recognized signaling molecules that modulate cardiovascular function	PMID: 21707953
sulfaguanidine	-4.886	-1087.32	-6.545	-1142.06	0.288674				A07AB03	Antibacterial	4 g
glibenclamide	-8.231	-1134.58	-8.082	-1142.19	0.231494		DB01016	an ATP-sensitive potassium channels inhibitor	A10BB01	type 2 diabetes.	7~10 mg		Glibenclamide may increase the probability of spontaneous termination of ventricular fibrillation and facilitate the restoration of the myocardial function during regional ischaemia.	PMID: 1291084
16-phenyltetranorprostaglandin_E2	-11.053	-1136.73	-10.545	-1142.43	0.225441
cyclopenthiazide	-6.023	-1133.73	-7.877	-1144.43	0.240457				C03AA07	a thiazide diuretic used in the treatment of heart failure and hypertension

## Sheet: NS_cmap
Drugs_name	LS_XP.GScore	LS_IFDScore	WT_XP.GScore	WT_IFDScore	CMAP	Adjusted scores	DrugBank ID	Phamrcological classes	WHO ATC code	original indication	Defined Daily Dose	Boxed warnings	notes	resource
disulfiram	-3.779	-1149.17	-4.511	-1129.34	0.198904		DB00822	the oxidation of alcohol blocker	N07BB01; P03AA04	chronic alcoholism	0.2 g for N07;	Yes
demecolcine	-6.431	-1152.06	-5.283	-1131.6	0.342879				L01CC01	oncology
iproniazid	-4.499	-1149.96	-5.032	-1132.09	0.171711		DB04818	a non-selective, irreversible monoamine oxidase inhibitor (MAOI)	N06AF05	antidepressant
amantadine	-4.07	-1149.99	-4.887	-1132.79	0.21673		DB00915	A Matrix protein 2 inhibitor	N04BB01	an antiviral and an antiparkinsonian medication	0.2 g	NO
vincamine	-8.476	-1153.28	-6.685	-1133.06	0.22566				C04AX07	primary degenerative and vascular dementia
levomepromazine	-5.585	-1151.98	-5.665	-1133.74	0.16362		DB01403	a D(2) dopamine receptor	N05AA02	psychosis, particular those of schizophrenia, and manic phases of bipolar disorder.	0.3 g
diphenhydramine	-5.564	-1150.68	-6.2	-1134.27	0.1675		DB01075	a H1 receptor antihistamine inhibitor	D04AA32; D04AA33; R06AA02		0.2 g	no
dopamine	-6.406	-1152.54	-6.799	-1134.49	0.204655		DB00988	a D dopamine receptor		For the correction of hemodynamic imbalances present in the shock syndrome due to myocardial infarction, trauma, endotoxic septicemia, open-heart surgery, renal failure, and chronic cardiac decompensation as in congestive failure		NO
isoflupredone	-7.116	-1153.02	-6.441	-1134.52	0.225766			a synthetic glucocorticoid corticosteroid
tolnaftate	-5.601	-1150.66	-6.273	-1134.74	0.194672		DB00525	Squalene monooxygenase	D01AE18	over-the-counter anti-fungal agent		no
quinpirole	-4.978	-1152.16	-5.847	-1134.89	0.22717			a D dopamine receptor
phenanthridinone	-5.477	-1152.58	-6.141	-1134.94	0.36738
etacrynic_acid	-6.352	-1152.24	-7.927	-1135.05	0.191055		DB00903	a Sodium/potassium-transporting ATPase subunit alpha-1 inhibitor	C03CC01	high blood pressure and edema caused by diseases like congestive heart failure, liver failure, and kidney failure	50 mg	no
dicycloverine	-5.083	-1150.97	-6.693	-1135.79	0.17457		DB00804	a Muscarinic acetylcholine receptor M1 inhibitor	A03AA07	an antispasmodic and in urinary incontinence
fludrocortisone	-8.401	-1152.9	-9.967	-1135.85	0.164032		DB00687	a mineralocorticoid receptor	H02AA02	anti-inflammatory	0.1 mg	no
ozagrel	-8.657	-1155.87	-6.924	-1135.91	0.189246			a thromboxane A2 synthesis inhibitor
tyrphostin_AG-1478	-6.729	-1156.2	-6.465	-1136.22	0.413433			a EGFR Inhibitor‎
W-13	-8.064	-1155.76	-6.871	-1136.4	0.18341
Prestwick-983	-5.231	-1153.93	-4.688	-1136.52	0.169604			A TWIST1 Inhibitor		oncology
clemastine	-6.618	-1154.42	-6.433	-1137	0.218055		DB00283	a histamine H1 antagonist	D04AA14; R06AA04	hay fever, rhinitis, allergic skin conditions, and pruritus	2 mg	no
podophyllotoxin	-7.1	-1154.31	-6.09	-1137.24	0.234189		DB01179	DNA topoisomerase 2-alpha	D06BB04	external genital warts
adiphenine	-7.502	-1153.84	-7.727	-1137.4	0.226185			an inhibitor of nicotinic receptors
phenyl_biguanide	-4.595	-1155.53	-4.319	-1137.77	0.230713			a 5-HT3 agonist
practolol	-7.587	-1156.64	-7.235	-1137.92	0.169999		DB01297	a beta-adrenergic receptor antagonist	C07AB01	cardiac arrhythmias	0.3 g
DL-PPMP	-6.842	-1155.35	-5.41	-1138.37	0.304432			an inhibitor of glucosylceramide synthetase
5186223	-6.718	-1153.82	-8.521	-1138.38	0.249951
chenodeoxycholic_acid	-7.268	-1154.74	-8.484	-1138.65	0.171891		DB06777	Bile acid receptor	A05AA01	Chenodiol is indicated for patients with radiolucent stones in well-opacifying gallbladders, in whom selective surgery would be undertaken except for the presence of increased surgical risk due to systemic disease or age.	1 g	no
carbenoxolone	-8.283	-1156.17	-8.589	-1138.72	0.185826		DB02329	3-alpha-(or 20-beta)-hydroxysteroid dehydrogenase	A02BX01		0.15 g
BW-B70C	-7.796	-1157.96	-9.324	-1139.59	0.34756			a novel inhibitor of arachidonic acid 5-lipoxygenase
5114445	-7.523	-1159.07	-9.456	-1140.4	0.177674
decitabine	-6.607	-1157.69	-8.332	-1141.8	0.212465		DB01262	an Nucleic Acid Synthesis Inhibitor	L01BC08	myelodysplastic syndrome; acute myeloid leukemia (AML)		no
iopromide	-12.245	-1159.78	-11.732	-1142.02	0.180686				V08AB05	a low osmolar, non-ionic contrast agent for intravascular use
cytochalasin_B	-9.286	-1159.31	-10.325	-1143.38	0.346087
atractyloside	-7.088	-1153.02	-12.554	-1143.67	0.170714			an effective ADP/ATP translocase inhibitor
sulfadimethoxine	-7.369	-1164.39	-5.313	-1145.32	0.179229		DB06150		J01ED01; G01AE10	infections	0.1 g	no
monensin	-11.06	-1161.42	-10.652	-1145.65	0.18887
iohexol	-11.991	-1162.15	-14.195	-1146.82	0.297902		DB01362		V08AB02
quercetin	-9.135	-1167.12	-9.122	-1148.4	0.180884		DB04216	a specific quinone reductase 2 (QR2) inhibitor		an antioxidant
naringenin	-6.896	-1162.02	-9.621	-1148.56	0.177929		DB03467

## Sheet: NS_lincs
Drugs_name	NS_XP.GScore	NS_IFDScore	WT_XP.GScore	WT_IFDScore	L1000	Adjusted scores	DrugBank ID	Phamrcological classes	WHO ATC code	original indication	Defined Daily Dose	Boxed warnings	notes	resource
PI-103	-5.416	-1152.26	-5.582	-1131.72	0.0462			a inhibitor of phosphoinositide 3-kinases (PI3Ks)
BRD-K92317137	-6.247	-1153.85	-6.268	-1134.31	0.0389
PAC 1	-6.927	-1150.98	-8.205	-1135.11	0.0389					oncology
528116.cdx	-6.177	-1154.8	-5.002	-1135.72	0.0438
S1205	-6.177	-1154.8	-5.002	-1135.72	0.0414			a inhibitor of phosphoinositide 3-kinases (PI3Ks)		oncology
BMS-387032	-5.572	-1153.81	-5.574	-1135.81	0.0438			a selective inhibitor of CDK2		oncology
JNK-9L	-6.753	-1156.2	-6.296	-1136.97	0.0414			a JNKs (c-Jun N-terminal kinases) inbitor		oncology
trichostatin A	-7.042	-1155.05	-7.315	-1137.33	0.0438			a histone deacetylase (HDAC) inhibitor		oncology
ARP 101	-8.484	-1155.85	-8.317	-1137.38	0.0389			an inhibitor of metalloproteinase-2 (MMP-2)		oncology
zileuton	-8.409	-1156.79	-7.467	-1138.01	0.0414		DB00744	an orally active inhibitor of 5-lipoxygenase		asthma		no
BRD-K95196255	-7.681	-1154.05	-9.469	-1138.2	0.0487
vorinostat	-7.37	-1156.49	-7.58	-1138.33	0.0487		DB02546	a histone deacetylase (HDAC) inhibitor	L01XX38	cutaneous T cell lymphoma (CTCL)		NO
5-azacytidine	-6.544	-1155.75	-8.021	-1141.09	0.056		DB00928	a DNA methyltransferase inhibitor	L01BC07	myelodysplastic syndrome
CGP-60474	-7.807	-1160.39	-6.699	-1141.1	0.0462			a selective inhibitor of CDK2		oncology
BRD-K85818861	-10.883	-1164.02	-7.785	-1142.05	0.0414			a dopamine receptor antagonist
vemurafenib	-8.005	-1157.75	-8.352	-1142.1	0.0389		DB08881	B-Raf enzyme inhibitor	L01XE15	late-stage melanoma		no		PMID:25437992
CGK-733	-6.721	-1156.03	-10.194	-1142.17	0.0414
dabrafenib	-7.377	-1160.1	-8.126	-1142.46	0.0414			B-Raf enzyme inhibitor	L01XE23	oncology
MK-0591	-6.57	-1155.67	-10.871	-1142.96	0.0462			a novel 5-lipoxygenase activating protein inhibitor		atopic asthma
PF-431396	-6.036	-1162.35	-8.007	-1145.93	0.0462			Dual focal adhesion kinase (FAK) and proline-rich tyrosine kinase 2 (PYK2) inhibitor
HY-10459	-6.713	-1162.91	-7.839	-1147.05	0.0511			a focal adhesion kinase (FAK)
WZ-3105	-8.527	-1163.96	-9.36	-1147.74	0.0438
